# Supplementary material
Source: Springer Nature journal article supplement (https://www.springermedizin.de/resource/supplementary/12890_2010_189_MOESM1_ESM.pdf/9504662)

**Percentage cross-shift decrease in PEF**

**Total dust(mg/m3)**

30,00  
20,00  
10,00  
0,00  
-10,00  
-20,00  
-30,00

-0,10

10,00

100,00

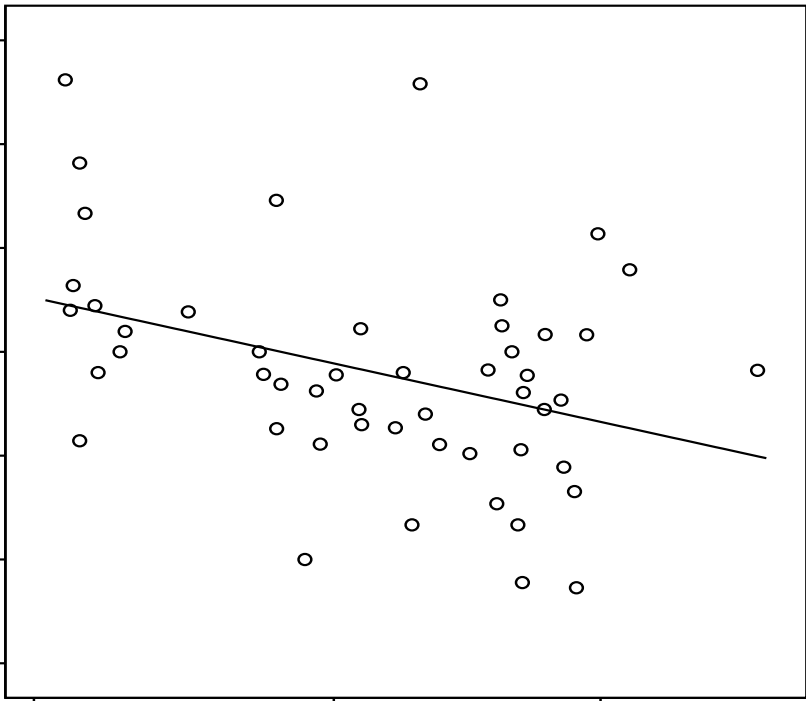

Supplement: MOESM1 [file 9504662]
